# Supplementary material for: Medication Reviews and Clinical Outcomes in Persons with Dementia: A Scoping Review
Source: MDPI journal article supplement (doi:10.3390/pharmacy11050168), 2023-10-20
Supplement: s1 [file s1]

**Table S1. Search strategy.**

OVID Medline

| #  | Search strategy                                                                                                                                                                                                                                                                                                          | Medline hits |
|----|--------------------------------------------------------------------------------------------------------------------------------------------------------------------------------------------------------------------------------------------------------------------------------------------------------------------------|--------------|
| 1  | exp Aged/                                                                                                                                                                                                                                                                                                                | 3372444      |
| 2  | ((older\$ or elderly or geriatric) adj2 (adult\$ or people\$ or patient\$ or in patient\$ or in-patient\$ or inpatient\$)).ti,ab,kw                                                                                                                                                                                      | 291927       |
| 3  | (aged or frail elderly or (health services adj3 aged) or community dwelling older adults).ti,ab,kw                                                                                                                                                                                                                       | 648093       |
| 4  | or/1-3                                                                                                                                                                                                                                                                                                                   | 3857586      |
| 5  | exp Dementia/ or exp Alzheimer Disease/ or exp Dementia, Vascular/ or exp Frontotemporal Dementia/                                                                                                                                                                                                                       | 187161       |
| 6  | exp Cognition Disorders/ or exp Cognition/ or exp Memory Disorders/                                                                                                                                                                                                                                                      | 297449       |
| 7  | exp Lewy Body Disease/                                                                                                                                                                                                                                                                                                   | 3864         |
| 8  | exp Korsakoff Syndrome/                                                                                                                                                                                                                                                                                                  | 545          |
| 9  | (dement\$ or (alzheimer or (lewy adj2 bod\$) adj2 diseas\$) or (chronic adj2 cerebrovascular)).ti,ab,kw                                                                                                                                                                                                                  | 142515       |
| 10 | (organic brain disease or organic brain syndrome).ti,ab,kw                                                                                                                                                                                                                                                               | 796          |
| 11 | (cerebr\$ adj2 (deteriorat\$ or insufficien\$) or binswanger\$ or (pick\$ disease)).ti,ab,kw                                                                                                                                                                                                                             | 5962         |
| 12 | (behavio?r\$ adj2 (modif\$ or chang\$ or improv\$)).ti,ab,kw                                                                                                                                                                                                                                                             | 74553        |
| 13 | or/5-12                                                                                                                                                                                                                                                                                                                  | 555768       |
| 14 | 4 and 13                                                                                                                                                                                                                                                                                                                 | 175244       |
| 15 | exp Medication Reconciliation/ or exp Medication Adherence/                                                                                                                                                                                                                                                              | 25488        |
| 16 | ((prescription\$ or prescribing or medication\$ or medicine\$ or drug therapy or pharmac\$ or drug regime\$ or drug therap\$ or pharmaceutical care or dosage\$ or dose\$) adj3 (review\$ or assess\$ or audit\$ or monitor\$ or reconcil\$ or manag\$ or monitor\$ or plan or record or adher\$ or concord\$)).ti,ab,kw | 113529       |
| 17 | 15 or 16                                                                                                                                                                                                                                                                                                                 | 128535       |
| 18 | 14 and 17                                                                                                                                                                                                                                                                                                                | 1857         |
| 19 | Limit 18 to English language                                                                                                                                                                                                                                                                                             | 1772         |

OVID Embase

| # | search strategy | Medline hits |
|---|-----------------|--------------|
| 1 | exp Aged/       | 3316437      |

|    |                                                                                                                                                                                                                                                                                                                          |         |
|----|--------------------------------------------------------------------------------------------------------------------------------------------------------------------------------------------------------------------------------------------------------------------------------------------------------------------------|---------|
| 2  | ((older\$ or elderly or geriatric) adj2 (adult\$ or people\$ or patient\$ or in patient\$ or in-patient\$ or inpatient\$)).ti,ab,kw                                                                                                                                                                                      | 418145  |
| 3  | (aged or frail elderly or (health services adj3 aged) or community dwelling older adults).ti,ab,kw                                                                                                                                                                                                                       | 896078  |
| 4  | or/1-3                                                                                                                                                                                                                                                                                                                   | 4036298 |
| 5  | exp Dementia/ or exp Alzheimer Disease/ or exp multiinfarct dementia/ or exp Frontotemporal Dementia/ or exp frontal variant frontotemporal dementia/ or Pick presenile dementia/ or semantic dementia/ or senile dementia/ or presenile dementia/                                                                       | 399376  |
| 6  | exp cognitive defect/ or exp Memory Disorders/                                                                                                                                                                                                                                                                           | 598959  |
| 7  | exp diffuse Lewy body disease/                                                                                                                                                                                                                                                                                           | 10136   |
| 8  | exp Korsakoff psychosis/                                                                                                                                                                                                                                                                                                 | 1550    |
| 9  | (dement\$ or (alzheimer or (lewy adj2 bod\$) adj2 diseas\$) or (chronic adj2 cerebrovascular)).ti,ab,kw                                                                                                                                                                                                                  | 210743  |
| 10 | (organic brain disease or organic brain syndrome).ti,ab,kw                                                                                                                                                                                                                                                               | 1040    |
| 11 | (cerebr\$ adj2 (deteriorat\$ or insufficien\$) or binswanger\$ or (pick\$ disease)).ti,ab,kw                                                                                                                                                                                                                             | 7535    |
| 12 | (behavio?r\$ adj2 (modif\$ or chang\$ or improv\$)).ti,ab,kw                                                                                                                                                                                                                                                             | 96104   |
| 13 | or/5-12                                                                                                                                                                                                                                                                                                                  | 719253  |
| 14 | 4 and 13                                                                                                                                                                                                                                                                                                                 | 201783  |
| 15 | exp Medication Reconciliation/ or exp Medication compliance/                                                                                                                                                                                                                                                             | 51136   |
| 16 | ((prescription\$ or prescribing or medication\$ or medicine\$ or drug therapy or pharmac\$ or drug regime\$ or drug therap\$ or pharmaceutical care or dosage\$ or dose\$) adj3 (review\$ or assess\$ or audit\$ or monitor\$ or reconcil\$ or manag\$ or monitor\$ or plan or record or adher\$ or concord\$)).ti,ab,kw | 188256  |
| 17 | 15 or 16                                                                                                                                                                                                                                                                                                                 | 214686  |
| 18 | 14 and 17                                                                                                                                                                                                                                                                                                                | 3329    |
| 19 | Limit 18 to English language                                                                                                                                                                                                                                                                                             | 3240    |

## SCOPUS

| #  | search strategy                                                                                                                               | Scopus    |
|----|-----------------------------------------------------------------------------------------------------------------------------------------------|-----------|
| #1 | TITLE-ABS-KEY ( ( older* OR "elderly" OR "geriatric" ) W/2 ( adult* OR people* OR patient* OR "in patient" OR "in-patient" OR "inpatient" ) ) | 416,837   |
| #2 | TITLE-ABS-KEY ( "aged" OR "frail elderly" OR ( "health services" W/3 "aged" ) OR "community dwelling older adults" )                          | 5,766,189 |

|     |                                                                                                                                                                                                                                                                                   |           |
|-----|-----------------------------------------------------------------------------------------------------------------------------------------------------------------------------------------------------------------------------------------------------------------------------------|-----------|
| #3  | #1 OR #2                                                                                                                                                                                                                                                                          | 5,887,136 |
| #4  | TITLE-ABS-KEY ( "Dementia" OR "Alzheimer Disease" OR "Alzheimer disorder" OR "multiinfarct dementia" OR "Frontotemporal Dementia" OR "frontal variant frontotemporal dementia" OR "Pick presenile dementia" OR "semantic dementia" OR "senile dementia" OR "presenile dementia" ) | 371,317   |
| #5  | TITLE-ABS-KEY ( "Cognition disorder" OR "Cognition" OR "Memory disorder" )                                                                                                                                                                                                        | 448,722   |
| #6  | TITLE-ABS-KEY ( "Lewy body disease" )                                                                                                                                                                                                                                             | 8,237     |
| #7  | TITLE-ABS-KEY ( "Korsakoff Syndrome" OR "Korsakoff psychosis" )                                                                                                                                                                                                                   | 2,703     |
| #8  | TITLE-ABS-KEY ( "Chronic" W/2 "cerebrovascular" )                                                                                                                                                                                                                                 | 1,306     |
| #9  | TITLE-ABS-KEY ( "organic brain disease" OR "organic brain syndrome" )                                                                                                                                                                                                             | 3,587     |
| #10 | TITLE-ABS-KEY ( cerebr* W/2 ( deteriorat* OR insufficien* ) OR binswanger* OR pick* AND disease )                                                                                                                                                                                 | 2,446     |
| #11 | TITLE-ABS-KEY ( behavio?r* W/2 ( modif* OR chang* OR improv* ) )                                                                                                                                                                                                                  | 61,824    |
| #12 | #4 OR #5 OR #6 OR #7 OR #8 OR #9 OR #10 OR #11                                                                                                                                                                                                                                    | 819,232   |
| #13 | #3 AND #12                                                                                                                                                                                                                                                                        | 249,393   |
| #14 | TITLE-ABS-KEY ( ( prescription* OR "prescribing" OR medication* OR medicin* OR "drug therapy" ) W/3 ( review* OR assess* OR audit* OR monitor* ) )                                                                                                                                | 48,267    |
| #15 | TITLE-ABS-KEY ( ( prescription* OR "prescribing" OR medication* OR medicin* OR "drug therapy" ) W/3 ( reconcil* OR manag* OR monitor* OR plan ) )                                                                                                                                 | 45,140    |
| #16 | TITLE-ABS-KEY ( ( prescription* OR "prescribing" OR medication* OR medicin* OR "drug therapy" ) W/3 ( "record" OR adher* OR concord* ) )                                                                                                                                          | 41,616    |
| #17 | TITLE-ABS-KEY ( ( pharmac* OR "drug regimen" OR "pharmaceutical care" OR dosage* OR dose* ) W/3 ( review* OR assess* OR audit* OR monitor* ) )                                                                                                                                    | 75,683    |
| #18 | TITLE-ABS-KEY ( ( pharmac* OR "drug regimen" OR "pharmaceutical care" OR dosage* OR dose* ) W/3 ( reconcil* OR manag* OR monitor* OR plan ) )                                                                                                                                     | 46,372    |
| #19 | TITLE-ABS-KEY ( ( pharmac* OR "drug regimen" OR "pharmaceutical care" OR dosage* OR dose* ) W/3 ( "record" OR adher* OR concord* ) )                                                                                                                                              | 8,372     |
| #20 | #14 OR #15 OR #16 OR #17 OR #18 OR #19                                                                                                                                                                                                                                            | 216,220   |
| #21 | #13 AND #20                                                                                                                                                                                                                                                                       | 3,470     |
| #22 | LIMIT-TO ( LANGUAGE , "English" )                                                                                                                                                                                                                                                 | 3,333     |

**Table S2. Definitions of types of care settings, pharmacist care interventions, drug related problems (DRPs) and drug related interventions (DRIs).**

|                                       | <b>Care settings</b>                      | <b>Description</b>                                                                                                                                                                                                                                                                                                                                                                                                                                                                                                                                                                                                                                                                                                                                                                           |
|---------------------------------------|-------------------------------------------|----------------------------------------------------------------------------------------------------------------------------------------------------------------------------------------------------------------------------------------------------------------------------------------------------------------------------------------------------------------------------------------------------------------------------------------------------------------------------------------------------------------------------------------------------------------------------------------------------------------------------------------------------------------------------------------------------------------------------------------------------------------------------------------------|
| Type of care settings                 | Community                                 | Patients receiving primary healthcare services outside of a designated accommodation facility while living independently or with family members [30]                                                                                                                                                                                                                                                                                                                                                                                                                                                                                                                                                                                                                                         |
|                                       | Hospital                                  | Facility that is distinguishable from a long-term care facility due to well established differences in the type and duration of specialist medical treatment [30]                                                                                                                                                                                                                                                                                                                                                                                                                                                                                                                                                                                                                            |
|                                       | Long-term care facility                   | Patients receiving primary healthcare services at the nursing homes/skilled nursing facilities/assisted living/residential living homes [29]                                                                                                                                                                                                                                                                                                                                                                                                                                                                                                                                                                                                                                                 |
|                                       | <b>Class</b>                              | <b>Description of main categories</b>                                                                                                                                                                                                                                                                                                                                                                                                                                                                                                                                                                                                                                                                                                                                                        |
| Type of Pharmacist Care Interventions | Cognitive Pharmacy Services (CPS)         | <p>Comprehensive Medication Management</p> <ul style="list-style-type: none"> <li>• With medications prescribed from another health care professional.</li> </ul> <p>Subdivided into 3 steps:</p> <ol style="list-style-type: none"> <li>1) Clinical assessment [30,35,38,40] <ul style="list-style-type: none"> <li>• Collect general medication history and other key clinical information</li> <li>• Conduct medication review</li> <li>• Identify drug related problems (DRPs)</li> </ul> </li> <li>2) Care Plan Creation and Implementation [38,40] <ul style="list-style-type: none"> <li>• Recommend interventions and solutions for DRPs</li> </ul> </li> <li>3) Evaluation [30,38,40] <ul style="list-style-type: none"> <li>• Follow-up and monitor results</li> </ul> </li> </ol> |
|                                       | Educational and Advisory Services [38,59] | <p>Secondary Patient Care Services</p> <ul style="list-style-type: none"> <li>• Perform additional patient care services, e.g., administer drugs via injection</li> </ul> <p>Management of Minor Conditions</p> <ul style="list-style-type: none"> <li>• Assessment and diagnosis, triage/referral, treatment, monitor and follow-up</li> </ul> <p>Patients, Family members, and Caregivers</p> <ul style="list-style-type: none"> <li>• Provide drug counselling services</li> </ul> <p>Health Care Professionals</p>                                                                                                                                                                                                                                                                       |

|              |                                                                                                                                                 |                                                                                                                                                                                                                                                                                                                                                                                                                                                                                                                                                                                                                                                                                                                                                                                                                                                                                                                                                               |
|--------------|-------------------------------------------------------------------------------------------------------------------------------------------------|---------------------------------------------------------------------------------------------------------------------------------------------------------------------------------------------------------------------------------------------------------------------------------------------------------------------------------------------------------------------------------------------------------------------------------------------------------------------------------------------------------------------------------------------------------------------------------------------------------------------------------------------------------------------------------------------------------------------------------------------------------------------------------------------------------------------------------------------------------------------------------------------------------------------------------------------------------------|
|              |                                                                                                                                                 | <ul style="list-style-type: none"> <li>• Provide advice and explanations on drug information and rationale for medication use</li> </ul> <p>Other health care workers e.g., staff workers at facilities</p> <ul style="list-style-type: none"> <li>• Provide advice and explanations on drug information and rationale for medication use</li> </ul>                                                                                                                                                                                                                                                                                                                                                                                                                                                                                                                                                                                                          |
|              | <b>Source</b>                                                                                                                                   | <b>Type of DRPs</b>                                                                                                                                                                                                                                                                                                                                                                                                                                                                                                                                                                                                                                                                                                                                                                                                                                                                                                                                           |
| Type of DRPs | Westerlund classification system [25], ASHP classification 1996 [52], Cipolle/Morley/Strand classification [53], PCNE Classification V 6.2 [54] | <ul style="list-style-type: none"> <li>• Non-conformity to guidelines / contra-indication</li> <li>• Drug without indication</li> <li>• Improper administration</li> <li>• Supratherapeutic dosage</li> <li>• Untreated indication</li> <li>• Subtherapeutic dosage</li> <li>• Unnecessary Drug Therapy</li> <li>• Needs Additional Therapy</li> <li>• Ineffective/Inappropriate drug</li> <li>• Too High Dosage</li> <li>• Drug use process errors: DRPs that occur due to inappropriate administration by a care provider</li> <li>• Drug monitoring</li> <li>• Drug interaction</li> <li>• Adverse drug reaction</li> <li>• Failure to receive drug</li> <li>• Length</li> <li>• Schedule</li> <li>• Failure to receive the full benefit of prescribed therapy</li> <li>• Drug-disease that are clinically significant</li> <li>• Lack of understanding of the medication</li> <li>• Inappropriate dose renal impairment</li> <li>• Dosage form</li> </ul> |
|              | <b>Source</b>                                                                                                                                   | <b>Type of DRIs</b>                                                                                                                                                                                                                                                                                                                                                                                                                                                                                                                                                                                                                                                                                                                                                                                                                                                                                                                                           |
| Type of DRIs | Pharmaceutical Care Network Europe Classification for Drug related problems [21]                                                                | <ul style="list-style-type: none"> <li>• No intervention</li> <li>• At prescriber level</li> <li>• At patient level</li> <li>• At drug level</li> </ul>                                                                                                                                                                                                                                                                                                                                                                                                                                                                                                                                                                                                                                                                                                                                                                                                       |

|  |  |                                                                                                                                        |
|--|--|----------------------------------------------------------------------------------------------------------------------------------------|
|  |  | <ul style="list-style-type: none"> <li>• Other intervention (e.g., side effect monitoring, health, and medicine monitoring)</li> </ul> |
|--|--|----------------------------------------------------------------------------------------------------------------------------------------|

**Table S3. Characteristics of included studies (n= 22) of the scoping review.**

| Study                          | Study characteristics                                       |                                                 | Participant characteristics                              |                                                                                   |                                                                              |                                                                            |                            |                                                    | Evaluation of medication use                             | Other                                    |
|--------------------------------|-------------------------------------------------------------|-------------------------------------------------|----------------------------------------------------------|-----------------------------------------------------------------------------------|------------------------------------------------------------------------------|----------------------------------------------------------------------------|----------------------------|----------------------------------------------------|----------------------------------------------------------|------------------------------------------|
|                                | Design; follow up; medication review conducted by           | Type of care setting; single center/multicenter | Sample size (N=)                                         | Study population                                                                  | Age                                                                          | Sex                                                                        | Classification of dementia | Secondary conditions                               |                                                          |                                          |
| <b>Canada</b>                  |                                                             |                                                 |                                                          |                                                                                   |                                                                              |                                                                            |                            |                                                    |                                                          |                                          |
| 1. Wilchesky et al., 2018 [36] | Observational pre-post study; 104 days; Clinical pharmacist | LTC; Multicenter                                | 44                                                       | Nursing home residents 65 years of age or older with diagnosis of severe dementia | 86.9 (6.9) (mean (SD))                                                       | 70.5% F<br>29.5% M                                                         | NR                         | 7.45 (2.46) (mean (SD)) Charlson Comorbidity Score | 7.86 (3.78) (mean (SD)) Number of Medication per patient | Level of Agitation and Pain              |
| <b>United States</b>           |                                                             |                                                 |                                                          |                                                                                   |                                                                              |                                                                            |                            |                                                    |                                                          |                                          |
| 2. Dong et al., 2021 [20]      | Retrospective study; NR; Clinical pharmacist                | Community, LTC, Hospital; Multicenter           | 129,820 (Intervention= 32,455; comparison group= 97,365) | Aged 65 years or older had AD                                                     | 79.04 (7.37) (mean (SD))-intervention<br>78.93 (7.86) (mean (SD))-comparison | 34.18% M<br>65.82% F<br>intervention<br>34.18% M<br>65.82% F<br>comparison | NR                         | NR                                                 | NR                                                       | Proportions of nonadherent beneficiaries |
| 3. Pearson et                  | Retrospective study; NR;                                    | Community (Academic geriatric                   | 40                                                       | Community-dwelling patients                                                       | 82.4 (67-98)                                                                 | 37.5% M<br>62.5% F                                                         | NR                         | NR                                                 | Donepezil Monotherapy (n= 3)                             |                                          |

|                               |                                                        |                                                       |     |                                                                |                           |                    |    |                                                 |                                                                                                                                                                                                                                                                                                                     |  |
|-------------------------------|--------------------------------------------------------|-------------------------------------------------------|-----|----------------------------------------------------------------|---------------------------|--------------------|----|-------------------------------------------------|---------------------------------------------------------------------------------------------------------------------------------------------------------------------------------------------------------------------------------------------------------------------------------------------------------------------|--|
| al., 2021 [38]                | Clinical pharmacist                                    | primary care clinics); Multicenter                    |     | with dementia                                                  | (mean (range))            |                    |    |                                                 | Donepezil + Memantine (n= 4)<br>Rivastigmine + Memantine (n= 2)<br>Galantamine + Memantine (n= 1)<br>Memantine Monotherapy (n= 7)                                                                                                                                                                                   |  |
| 4. Bach et al., 2017 [44]     | Prospective study; NR; Clinical pharmacist             | LTC (Nursing homes); Multicenter                      | 20  | Nursing home residents diagnosed with dementia                 | 87.1 (7.9) (mean (SD))    | 90% F<br>10% M     | NR | NR                                              | 13.3 (5.5) (mean (SD))<br>number of medications<br>Olanzapine 25%<br>Quetiapine 60%<br>Risperidone 15%                                                                                                                                                                                                              |  |
| 5. Levine et al., 2021 [39]   | Retrospective study; NR; Clinical pharmacist           | Community (Living home); Single center                | 29  | Older adults aged ≥ 65 years, living at home with dementia     | 78.9 (7.2) (mean (SD))    | 48.3% F<br>51.7% M | NR | 3.21 (1.5)<br>Average comorbidities per patient | 8.3 (3.9) (mean (SD))<br>number of medications<br>Memory agents 41.7%<br>Acetylcholinesterase inhibitors 43.3%<br>NMDA antagonist 38.95%<br>Central nervous system agents 10.7%<br>Antidepressants 9.6%<br>Anxiolytics 4.2%<br>Anticonvulsants 26.7%<br>Antiparkinsonian agents 28.6%<br>Anticholinergic agents 10% |  |
| 6. Melville et al., 2020 [40] | Retrospective study; NR; Geriatric clinical pharmacist | Community (Tertiary care Veterans Affairs health care | 104 | Older Adults with dementia attending Outpatients in a tertiary | 81 (65-99) (mean (range)) | 4% F<br>96% M      | NR | NR                                              | NR                                                                                                                                                                                                                                                                                                                  |  |



|                                              |                                            |                                              |                                 |                                                      |                                                                     |                                                              |                                                                                                                                                                      |                                                                                       |                                                                                                |                                                            |
|----------------------------------------------|--------------------------------------------|----------------------------------------------|---------------------------------|------------------------------------------------------|---------------------------------------------------------------------|--------------------------------------------------------------|----------------------------------------------------------------------------------------------------------------------------------------------------------------------|---------------------------------------------------------------------------------------|------------------------------------------------------------------------------------------------|------------------------------------------------------------|
|                                              |                                            | system<br>Outpatients<br>); Single<br>center |                                 | care<br>Veterans<br>Affairs<br>health care<br>system |                                                                     |                                                              |                                                                                                                                                                      |                                                                                       |                                                                                                |                                                            |
| <b>United Kingdom</b>                        |                                            |                                              |                                 |                                                      |                                                                     |                                                              |                                                                                                                                                                      |                                                                                       |                                                                                                |                                                            |
| 6. Aziz et al., 2018 [49]                    | Audit study; NR; Consultant Pharmacist     | Hospital (Cwm Taf UHB); Multicenter          | 58 first audit<br>47 re-audit   | Psychiatric in-patients with dementia                | 78.33 (2.74) (mean (SD))<br>first audit<br>78.72 (3.11)<br>re-audit | 53.5% F<br>46.5% M first audit<br>63% F<br>37% M<br>Re-audit | Alzheimer's dementia (n= 18)<br>Vascular dementia (n= 21)<br>Dementia with Lewy bodies (n= 5)<br>Mixed Alzheimer's/vascular dementia (n= 7)<br>Other dementia (n= 6) | 6.23 (1.52)<br>Average comorbidities per patient- first audit<br>5.73 (1.02) re-audit | 10.88 (1.27) Average number of prescriptions per patient- first audit<br>10.15 (0.58) re-audit |                                                            |
| 7. Ballard et al., 2016 [31] (primary study) | Randomized controlled trial; NR; Therapist | LTC (Nursing Care homes); Multicenter        | 277 (Residents on anti-psychoti | People with dementia living in nursing homes         | 85.26 (7.02) (mean (SD))                                            | 74% F<br>26% M                                               | NR                                                                                                                                                                   | NR                                                                                    | NR                                                                                             | Cohen-Mansfield Agitation Inventory score, Neuropsychiatri |

|                                                  |                                                                                               |                                            |                                                          |                                                                                        |                                        |                 |                                                                                                           |    |                                                                                                                                                                |                                                                             |
|--------------------------------------------------|-----------------------------------------------------------------------------------------------|--------------------------------------------|----------------------------------------------------------|----------------------------------------------------------------------------------------|----------------------------------------|-----------------|-----------------------------------------------------------------------------------------------------------|----|----------------------------------------------------------------------------------------------------------------------------------------------------------------|-----------------------------------------------------------------------------|
| Ballard et al., 2017 [32] (secondary study)      |                                                                                               |                                            | c review 146; Residents not on antipsychotic review=131) |                                                                                        |                                        |                 |                                                                                                           |    |                                                                                                                                                                | c Inventory score, quality of life                                          |
| 8. Maidment et al., 2020 [50]                    | Feasibility study; 6 months; Specialist dementia care pharmacist                              | LTC (Residents in care homes); Multicenter | 29                                                       | People living with moderate to severe dementia                                         | 83.6 (9.3) (mean (SD)) 66- 100 (range) | 62.1% F 37.9% M | NR                                                                                                        | NR | medication involved in medication reviews, citalopram (n= 6) Sertraline (n= 4) Mirtazapine (n= 4) Antihistamines (n= 3) Trimipramine (n= 1) Amisulpride (n= 1) | Neuropsychiatric Inventory score, quality of life                           |
| Netherlands                                      |                                                                                               |                                            |                                                          |                                                                                        |                                        |                 |                                                                                                           |    |                                                                                                                                                                |                                                                             |
| 9. Smeets et al., 2021 [33] (primary study)      | Randomized controlled trial; 18 months; Elderly care physician, pharmacist, nurse (assistant) | LTC; Multicenter                           | 222                                                      | Nursing home residents living in the participating dementia special care units (DSCUs) | 84 (7.4) (mean (SD)) 55–99 (range)     | 78% F 22% M     | Alzheimer's dementia 41% Vascular dementia 12% Mixed Alzheimer's/vascular dementia 10% Other dementia 37% |    | Any antipsychotic, antidepressant, hypnotic, and/or anxiolytic:- 48% Antipsychotics25% Antidepressants 25% Hypnotics (14%) Anxiolytics (14%)                   | Cohen-Mansfield Agitation Inventory score, Neuropsychiatric Inventory score |
| Van Der Spek et al., 2018 [34] (secondary study) |                                                                                               |                                            |                                                          |                                                                                        |                                        |                 |                                                                                                           |    |                                                                                                                                                                |                                                                             |
| Slovenia                                         |                                                                                               |                                            |                                                          |                                                                                        |                                        |                 |                                                                                                           |    |                                                                                                                                                                |                                                                             |

|                                 |                                                                                                                    |                                                     |     |                                                                                                                |                        |    |    |    |    |                                     |
|---------------------------------|--------------------------------------------------------------------------------------------------------------------|-----------------------------------------------------|-----|----------------------------------------------------------------------------------------------------------------|------------------------|----|----|----|----|-------------------------------------|
| 10.<br>Stuhec et al., 2021 [35] | Observational pre-post study; NR; Clinical pharmacist                                                              | Community ; Multicenter                             | 19  | Elderly patients aged 65 years or above diagnosed with dementia                                                | NR                     | NR | NR | NR | NR |                                     |
| <b>France</b>                   |                                                                                                                    |                                                     |     |                                                                                                                |                        |    |    |    |    |                                     |
| 12.<br>Novais et al., 2021 [41] | Retrospective study; NR; Senior pharmacists or resident pharmacists                                                | Hospital (Cognitive-behavioral unit); Single center | 543 | Elderly patients admitted in a cognitive-behavioral unit with Alzheimer's disease and Related Dementia (ADRD)) | 79.0 (9.5) (mean (SD)) | NR | NR | NR | NR | Economic, and organizational impact |
| <b>Spain</b>                    |                                                                                                                    |                                                     |     |                                                                                                                |                        |    |    |    |    |                                     |
| 13.<br>Weeks et al., 2019 [42]  | Retrospective study; 4 weeks; Carers, nursing staff, physicians, physical & leisure therapists, and administrators | LTC (Nursing homes); Multicenter                    | 606 |                                                                                                                | NR                     | NR | NR | NR | NR |                                     |

|                                    |                                                                                                                                                           |                                                                                                     |     |                                                                                   |                        |                |                                                                                                                           |                                                                                                                                                                                                                                                                        |                                                                                                                                                                                                                                          |                        |
|------------------------------------|-----------------------------------------------------------------------------------------------------------------------------------------------------------|-----------------------------------------------------------------------------------------------------|-----|-----------------------------------------------------------------------------------|------------------------|----------------|---------------------------------------------------------------------------------------------------------------------------|------------------------------------------------------------------------------------------------------------------------------------------------------------------------------------------------------------------------------------------------------------------------|------------------------------------------------------------------------------------------------------------------------------------------------------------------------------------------------------------------------------------------|------------------------|
| 14.<br>Massot et al., 2019 [37]    | Prospective, observational pre-post study; 6 months; Neurologist, a psychiatrist, a geriatrician, 2 primary care general practitioners and 4 pharmacists, | LTC (Nursing homes associated with a single primary care team); Multicenter                         | 240 | Institutionalized patients diagnosed with dementia                                | 87.9 (6.8) (mean (SD)) | 75% F<br>25% M | NR                                                                                                                        | NR                                                                                                                                                                                                                                                                     | 2.71 (1.47) average number psychotropic drugs/patient                                                                                                                                                                                    |                        |
| 15.<br>Hernandez et al., 2020 [45] | Prospective study; NR; Pharmacist and a geriatrician                                                                                                      | LTC (long-term care psychogeriatric unit (21 beds) in an intermediate care hospital); Single center | 65  | Patients with dementia admitted to control behavioural and psychological symptoms | 84.9 (6.7) (mean (SD)) | 60% F<br>40% M | Alzheimer's dementia 30.8% Vascular dementia 7.7% Dementia with Lewy bodies 7.7% Mixed Alzheimer's/vascular dementia 4.6% | Diseases of the circulatory system 83.1% Endocrine, nutritional, and metabolic diseases 60% genitourinary system 32.3% musculoskeletal system and connective tissue 29.2% nervous system 27.7% Neoplasms 16.9% Injury, poisoning, and certain other consequences 26.2% | 9.0 (3.1) average number psychotropic drugs/patient Antipsychotics 78.5% hypnotics and sedatives)/anxiolytics 47.7% antidepressants 53.9% analgesics 66.2% anti-dementia drugs 30.9% antiepileptic drugs 12.3% anti-Parkinson drugs 4.6% | Anticholinergic burden |

|                              |                                                                                                                     |                                                                                                       |    |                                                                     |                                        |                   |                     |                                                                                                                                                                                                   |                                                                                       |                                                                                                                       |
|------------------------------|---------------------------------------------------------------------------------------------------------------------|-------------------------------------------------------------------------------------------------------|----|---------------------------------------------------------------------|----------------------------------------|-------------------|---------------------|---------------------------------------------------------------------------------------------------------------------------------------------------------------------------------------------------|---------------------------------------------------------------------------------------|-----------------------------------------------------------------------------------------------------------------------|
|                              |                                                                                                                     |                                                                                                       |    |                                                                     |                                        |                   | Other dementia 6.2% | digestive system 23.1%<br>eye and adnexa 16.9%<br>blood and blood-forming organs 15.4%<br>Mental and behavioural disorders 15.4%<br>respiratory system 12.3%<br>skin and subcutaneous tissue 1.5% |                                                                                       |                                                                                                                       |
| 16. Molist et al., 2014 [14] | Observational pre-post study; NR; Two geriatricians and a clinical pharmacist                                       | Hospital (advanced dementia admitted to acute geriatric unit); Single center                          | 73 | Patients with advanced dementia                                     | 86.1 (5.73) (mean (SD)) 72–100 (range) | 79.45% F 20.55% M | NR                  | Trauma 35.61%<br>Infection 36.98%<br>Respiratory infections 44.34%<br>Urinary tract infections 33.26%<br>Cardiovascular disease 20.54%                                                            | 7.27 average of medications prior to hospitalization                                  |                                                                                                                       |
| <b>Taiwan</b>                |                                                                                                                     |                                                                                                       |    |                                                                     |                                        |                   |                     |                                                                                                                                                                                                   |                                                                                       |                                                                                                                       |
| 17. Liang et al., 2017 [46]  | Prospective study; 12 months; Dementia specialist, a special nurse with expertise in dementia care, a pharmacist, a | LTC and Community (intervention in Jia-Li Veterans Home and usual care model in the community (Memory | 61 | Participants aged 65 years and older with mild-to-moderate dementia | 85.8 (5.6) (mean (SD))                 | NR                | NR                  | NR                                                                                                                                                                                                | Use of anti-dementia drug included acetylcholinesterase inhibitor and memantine 88.5% | Delaying cognitive and physical decline, and improvement or prevention of geriatric syndromes during 1-year follow up |

|                                                  |                                                                                                        |                                                        |     |                                       |                                 |             |                                                                                                       |                                                           |                                                                        |                                                                           |
|--------------------------------------------------|--------------------------------------------------------------------------------------------------------|--------------------------------------------------------|-----|---------------------------------------|---------------------------------|-------------|-------------------------------------------------------------------------------------------------------|-----------------------------------------------------------|------------------------------------------------------------------------|---------------------------------------------------------------------------|
|                                                  | dietician, a physical therapist, an occupational therapist, a clinical psychologist and social workers | clinic)); Multicenter                                  |     |                                       |                                 |             |                                                                                                       |                                                           |                                                                        |                                                                           |
| <b>Australia</b>                                 |                                                                                                        |                                                        |     |                                       |                                 |             |                                                                                                       |                                                           |                                                                        |                                                                           |
| 18. Cross et al., 2020 [51]                      | Pre- and post-intervention feasibility study; 6 months; Two consultant pharmacists                     | Community (outpatient memory clinics); Single center   | 50  | Patients attending the memory clinics | 80.5 (71.5-85.0) (median (IQR)) | 36% F 64% M | Alzheimer's dementia 16% Mixed dementia 14% Mild cognitive impairment 26% Not confirmed diagnosis 26% | 4.94 (1.89) (mean (SD)) Charlson comorbidity index        | 11 (8-13.25) (median (IQR)) Median number of medications at home visit | Quality of life (EQ-5D), tool for adherence behaviour screening Adherence |
| <b>Northern Sweden</b>                           |                                                                                                        |                                                        |     |                                       |                                 |             |                                                                                                       |                                                           |                                                                        |                                                                           |
| 19. Gustafsson et al., 2017 [26] (primary study) | Randomized controlled trial; 6 months; Three                                                           | Hospital (Patients admitted to acute internal medicine | 212 | 65 years or older and had dementia    | 83.1 (6.6) (mean (SD))          | 63% F 37% M | Alzheimer's dementia 30% Vascular                                                                     | Heart failure 34% Hypertension 55% Cardiac arrhythmia 29% | 8.4 (3.6) average number of drugs                                      | Drug-related readmissions                                                 |

|                                                |                      |                                                                                                               |                                                |  |                                                                              |                                                                            |                                                     |                                                                                                                                                                                                                                                                                                |                                                                                                                                                     |  |
|------------------------------------------------|----------------------|---------------------------------------------------------------------------------------------------------------|------------------------------------------------|--|------------------------------------------------------------------------------|----------------------------------------------------------------------------|-----------------------------------------------------|------------------------------------------------------------------------------------------------------------------------------------------------------------------------------------------------------------------------------------------------------------------------------------------------|-----------------------------------------------------------------------------------------------------------------------------------------------------|--|
| Gustafsson et al., 2018 [27] (secondary study) | clinical pharmacists | wards at the Skellefteå County Hospital and Umeå University Hospital and to the orthopedic ward); Multicenter |                                                |  |                                                                              |                                                                            | dementia 20%<br>Other or unspecified dementia 47.6% | Diabetes mellitus 29%<br>Chronic obstructive pulmonary disease 8%<br>Malignant disease 13%<br>Myocardial infarction 17%<br>Stroke, past 24%                                                                                                                                                    |                                                                                                                                                     |  |
| Pfister et al., 2017 [17] (secondary study)    |                      |                                                                                                               | 140 People with DRPs<br>72 People without DRPs |  | 83.7 (6.6) (mean (SD))<br>People with DRPs 82.0 (6.3)<br>People without DRPs | 62.9% F 37.1% M<br>People with DRPs 62.5% F 37.5% M<br>People without DRPs | NR                                                  | People with DRPs:<br>Heart failure 35.7%<br>Cardiac arrhythmia 28.6%<br>Diabetes mellitus 30.7%<br>Chronic obstructive pulmonary disease 7.1%<br>Stroke, past 31.4%<br>People without DRPs:<br>Heart failure 30.6%<br>Cardiac arrhythmia 30.6%<br>Diabetes mellitus 25%<br>Chronic obstructive | People with DRPs: - 9.3 (3.4) average number of drugs at randomization<br>People without DRPs: - 6.8 (3.4) average number of drugs at randomization |  |

|                                                             |                                                         |                               |                                                                                                                                                      |                                                                                               |                                                                                                                                                                                           |                                                                                                                                                                                         |    |                                                                                                                                                                                                                                                                                                                                               |                                                                                                                                                                                                                                               |                                      |
|-------------------------------------------------------------|---------------------------------------------------------|-------------------------------|------------------------------------------------------------------------------------------------------------------------------------------------------|-----------------------------------------------------------------------------------------------|-------------------------------------------------------------------------------------------------------------------------------------------------------------------------------------------|-----------------------------------------------------------------------------------------------------------------------------------------------------------------------------------------|----|-----------------------------------------------------------------------------------------------------------------------------------------------------------------------------------------------------------------------------------------------------------------------------------------------------------------------------------------------|-----------------------------------------------------------------------------------------------------------------------------------------------------------------------------------------------------------------------------------------------|--------------------------------------|
|                                                             |                                                         |                               |                                                                                                                                                      |                                                                                               |                                                                                                                                                                                           |                                                                                                                                                                                         |    | pulmonary disease 8.3%<br>Stroke, past 12%                                                                                                                                                                                                                                                                                                    |                                                                                                                                                                                                                                               |                                      |
| Abramsso<br>n et al.,<br>2020 [28]<br>(secondar<br>y study) |                                                         |                               | 153<br>Patients<br>with<br>DRPs<br>identifie<br>d by<br>STOPP/<br>START<br>59<br>Patients<br>without<br>DRPs<br>identifie<br>d by<br>STOPP/<br>START |                                                                                               | 83.7<br>(6.3)<br>(mean<br>(SD))<br>People<br>with<br>DRPs<br>identifie<br>d by<br>STOPP/<br>START<br>81.6<br>(7.1)<br>Patients<br>without<br>DRPs<br>identifie<br>d by<br>STOPP/<br>START | 64.7% F<br>35.3%<br>M<br>People<br>with<br>DRPs<br>identifie<br>d by<br>STOPP/<br>START<br>57.6% F<br>42.4%<br>M<br>Patients<br>without<br>DRPs<br>identifie<br>d by<br>STOPP/<br>START | NR | People with DRPs<br>identified by<br>STOPP/START: -<br>Heart failure<br>38.6%<br>Cardiac<br>arrhythmia 32.7%<br>Diabetes mellitus<br>29.4%<br>Stroke, past<br>26.1%<br>Patients without<br>DRPs identified<br>by<br>STOPP/START: -<br>Heart failure 22%<br>Cardiac<br>arrhythmia 20.3%<br>Diabetes mellitus<br>27.1%<br>Stroke, past<br>16.9% | 9.1 (3.5) (mean (SD))<br>average number of<br>drugs prescribed-<br>People with DRPs<br>identified by<br>STOPP/START<br>6.8 (3.2) (mean (SD))<br>average number of<br>drugs prescribed-<br>People without DRPs<br>identified by<br>STOPP/START |                                      |
| <b>Germany</b>                                              |                                                         |                               |                                                                                                                                                      |                                                                                               |                                                                                                                                                                                           |                                                                                                                                                                                         |    |                                                                                                                                                                                                                                                                                                                                               |                                                                                                                                                                                                                                               |                                      |
| 20.<br>Wucherer<br>et al.,<br>2017 [43]                     | Retrospectiv<br>e study; NR;<br>Clinical<br>pharmacists | Community<br>;<br>Multicenter | 446<br>Total<br>(without<br>DRP +<br>With<br>DRP)                                                                                                    | Community<br>-dwelling<br>primary<br>care<br>patients<br>screened<br>positive for<br>dementia | 79.8<br>(5.4)<br>(mean<br>(SD))                                                                                                                                                           | 57.6% F<br>42.4%<br>M                                                                                                                                                                   | NR | Formal diagnosis<br>of dementia<br>37.2%<br>Diagnosis of<br>mental and<br>behavioral<br>disorders 25.9%<br>Depression 16.1%                                                                                                                                                                                                                   | 6.4 (3.2) average<br>number of drugs<br>prescribed                                                                                                                                                                                            | Degree of<br>cognitive<br>impairment |



|                            |                                             |                                                        |    |                                                            |                           |             |    |                                                             |                                                |                               |
|----------------------------|---------------------------------------------|--------------------------------------------------------|----|------------------------------------------------------------|---------------------------|-------------|----|-------------------------------------------------------------|------------------------------------------------|-------------------------------|
|                            |                                             |                                                        |    |                                                            |                           |             |    | 12.1 (7.3) average comorbid diagnoses                       |                                                |                               |
| <b>Denmark</b>             |                                             |                                                        |    |                                                            |                           |             |    |                                                             |                                                |                               |
| 21. Tang et al., 2016 [47] | Prospective study; NR; Clinical pharmacists | Long-Term Care Facility (Nursing homes); Single center | 12 | Nursing home above 65 years of age diagnosed with dementia | 87 (77-96) (mean (range)) | 42% M 58% F | NR | 4.4 (range 2–8) average number of diagnoses per patient was | 83 total number of prescription in 12 patients | Pain intensity, pain symptoms |
| <b>Hong Kong</b>           |                                             |                                                        |    |                                                            |                           |             |    |                                                             |                                                |                               |
| 22. Wong et al., 2016 [48] | Prospective study, NR; Clinical pharmacists | Hospital; Single center                                | 54 | Elderly with dementia                                      | NR                        | NR          | NR | NR                                                          | NR                                             |                               |

Note: - LTC, Long-term care facility; SD, standard deviation; F, Female; M, Male; NR, Not reported; AD, Alzheimer's disease; NMDA, N-methyl-D-aspartate; DRPs, Drug-related problems.

**Table S4. Summary of interventions with reported outcomes.**

|                                                                                         | Study |   |   |   |   |   |   |   |   |    |    |    |    |    |    |    |    |    |    |    |    |    |
|-----------------------------------------------------------------------------------------|-------|---|---|---|---|---|---|---|---|----|----|----|----|----|----|----|----|----|----|----|----|----|
| Reported outcomes                                                                       | 1     | 2 | 3 | 4 | 5 | 6 | 7 | 8 | 9 | 10 | 11 | 12 | 13 | 14 | 15 | 16 | 17 | 18 | 19 | 20 | 21 | 22 |
| Medication Prescription Processing (MPP)                                                |       |   |   |   |   |   |   |   |   |    |    |    |    |    |    |    |    |    |    |    |    |    |
| 1. Comprehensive Medication Management- Clinical Assessment [30,35,38,40]               |       |   |   |   |   |   |   |   |   |    |    |    |    |    |    |    |    |    |    |    |    |    |
| a) Collect general medication history and other key clinical information                |       |   |   |   | X | X |   | X | X | X  | X  | X  | X  | X  | X  | X  | X  | X  | X  | X  | X  |    |
| b) Conduct medication review                                                            | X     | X | X | X | X | X | X | X | X | X  | X  | X  | X  | X  | X  | X  | X  | X  | X  | X  | X  | X  |
| c) Identify drug related problems (DRPs)                                                |       |   | X |   | X | X |   |   |   |    | X  | X  |    |    | X  |    |    | X  | X  | X  |    | X  |
| 2. Comprehensive Medication Management- Care Plan Creation and Implementation [38,40]   |       |   |   |   |   |   |   |   |   |    |    |    |    |    |    |    |    |    |    |    |    |    |
| a) Recommend interventions and solutions for DRPs                                       |       |   | X |   | X |   |   |   |   | X  | X  | X  |    |    | X  | X  |    |    | X  |    | X  |    |
| 3. Comprehensive Medication Management- Evaluation [30,38,40]                           |       |   |   |   |   |   |   |   |   |    |    |    |    |    |    |    |    |    |    |    |    |    |
| a) Follow-up and monitor results                                                        |       |   |   |   |   |   |   |   | X | X  | X  | X  |    | X  | X  |    |    | X  | X  |    |    |    |
| Educational and Advisory Services [30,38]                                               |       |   |   |   |   |   |   |   |   |    |    |    |    |    |    |    |    |    |    |    |    |    |
| 1. Secondary Patient Care Services                                                      |       |   |   |   |   |   |   |   |   |    |    |    |    |    |    |    |    |    |    |    |    |    |
| a) Perform additional patient care services, e.g. administer drugs via injection        |       |   |   |   |   |   |   |   |   |    |    |    |    |    |    |    |    |    |    |    |    |    |
| 2. Management of Minor Conditions                                                       |       |   |   |   |   |   |   |   |   |    |    |    |    |    |    |    |    |    |    |    |    |    |
| a) Assessment and diagnosis, triage/referral, treatment, monitor and follow-up          |       |   |   |   |   |   |   |   |   |    |    |    |    |    |    |    |    |    | X  |    |    |    |
| 3. Patients, Family members, and Caregivers                                             |       |   |   |   |   |   |   |   |   |    |    |    |    |    |    |    |    |    |    |    |    |    |
| a) Provide drug counselling services                                                    |       |   |   |   |   |   |   |   |   |    |    |    |    |    |    |    |    |    |    |    |    | X  |
| 4. Health Care Professionals                                                            |       |   |   |   |   |   |   |   |   |    |    |    |    |    |    |    |    |    |    |    |    |    |
| a) Provide advice and explanations on drug information and rationale for medication use |       |   |   |   |   | X |   | X |   |    |    |    |    | X  |    |    |    | X  |    |    |    |    |

|                                                                                                                                                     |   |   |    |    |   |   |   |   |   |   |     |     |   |   |     |   |   |     |   |   |    |  |
|-----------------------------------------------------------------------------------------------------------------------------------------------------|---|---|----|----|---|---|---|---|---|---|-----|-----|---|---|-----|---|---|-----|---|---|----|--|
| 5. Other health care workers e.g., staff workers at facilities                                                                                      |   |   |    |    |   |   |   |   |   |   |     |     |   |   |     |   |   |     |   |   |    |  |
| a) Provide advice and explanations on drug information and rationale for medication use                                                             |   |   |    |    |   |   |   |   |   |   |     |     |   |   |     |   |   |     |   |   |    |  |
| Evaluation of medication use                                                                                                                        | X | X | X  | X  | X | X | X | X | X |   |     | X   | X | X | X   | X | X |     |   |   | X  |  |
| Cost/time effectiveness                                                                                                                             |   |   |    |    |   |   |   | X |   |   |     | X   |   |   |     |   |   |     |   |   |    |  |
| Drug Related Interventions                                                                                                                          |   |   |    |    |   |   |   |   |   |   |     |     |   |   |     |   |   |     |   |   |    |  |
| a) At prescriber level                                                                                                                              |   |   |    | X  |   |   |   |   |   |   | X   | X   |   |   | X   |   |   | X   | X |   |    |  |
| b) At patient level                                                                                                                                 |   |   |    |    |   |   |   |   |   |   |     |     |   |   |     |   |   |     |   |   |    |  |
| c) At drug level                                                                                                                                    |   |   | X  |    |   |   |   |   |   |   | X   | X   |   |   | X   |   |   | X   | X |   |    |  |
| d) Other intervention or activity                                                                                                                   |   |   |    |    |   |   |   |   |   | X |     |     |   |   |     |   |   |     |   |   |    |  |
| Proposed intervention                                                                                                                               |   |   | 49 | 12 |   |   |   |   |   | 3 | 248 | 543 |   |   | 175 |   |   | 261 |   |   | 17 |  |
| Accepted intervention                                                                                                                               |   |   | 14 | 4  |   |   |   |   |   | 3 | 110 | 269 |   |   | 152 |   |   | 136 |   |   | 1  |  |
| Secondary outcomes (Cohen-Mansfield Agitation Inventory score, Neuropsychiatric Inventory score, Anticholinergic burden, Drug-related readmissions) | X |   |    |    |   |   | X | X | X |   |     |     |   |   | X   |   |   | X   | X | X |    |  |
| Other outcomes                                                                                                                                      |   |   |    |    |   |   | X | X |   |   |     | X   |   |   |     |   | X | X   |   |   | X  |  |

Other outcomes such as quality of life, improvement, or prevention of geriatric syndromes during 1-year follow up, Pain intensity

**Table S5. Overview of medication review and important clinical outcomes reported.**

| Study                       | Group                                               | Before medication review                                                                                                                                                                                                                                        | After medication review                                                                                                                                                                                                                                        | Important outcomes reported                                                                                                                                                                    |
|-----------------------------|-----------------------------------------------------|-----------------------------------------------------------------------------------------------------------------------------------------------------------------------------------------------------------------------------------------------------------------|----------------------------------------------------------------------------------------------------------------------------------------------------------------------------------------------------------------------------------------------------------------|------------------------------------------------------------------------------------------------------------------------------------------------------------------------------------------------|
| Wilchesky et al., 2018 [36] | Total number of regular medications                 | 372                                                                                                                                                                                                                                                             | 327                                                                                                                                                                                                                                                            | A significant 12.1% reduction (OR: 0.81; 95% CI: 0.70–0.92) in overall medication burden                                                                                                       |
|                             | Total number of “sometimes” appropriate medications | 194                                                                                                                                                                                                                                                             | 167                                                                                                                                                                                                                                                            | Decreased (from 194 pre to 167 post-intervention)                                                                                                                                              |
|                             | The mean number of regular medications per resident | 7.86 (3.78) (mean (SD))                                                                                                                                                                                                                                         | 6.82 (3.75) (mean (SD))                                                                                                                                                                                                                                        | Decreased from 7.86 to 6.81 (p = 0.007))                                                                                                                                                       |
| Dong et al., 2021 [20]      | Proportions of nonadherent beneficiaries            | Intervention: -<br>Medication for Diabetes 13.1%<br>Medication for Hypertension 16.39%<br>Medication for Hyperlipidemia 18.69%<br>Comparison: -<br>Medication for Diabetes 10.84%<br>Medication for Hypertension 13.57%<br>Medication for Hyperlipidemia 16.06% | Intervention: -<br>Medication for Diabetes 9.78%<br>Medication for Hypertension 12.5%<br>Medication for Hyperlipidemia 11.72%<br>Comparison: -<br>Medication for Diabetes 12.08%<br>Medication for Hypertension 17.25%<br>Medication for Hyperlipidemia 17.83% | Following a medication review, the percentage of non-adherent beneficiaries in the intervention group for each prescription category reduced, but they grew in the comparison group over time. |
| Pearson et al., 2021 [38]   | 180-day reduction in baseline PIM usage             | 1.5 PIMs per patient                                                                                                                                                                                                                                            | 0.9 PIMs per patient                                                                                                                                                                                                                                           | Decrease from 1.5 PIMs per patient to 0.9 PIMs per patient in the patients living with dementia group                                                                                          |
| Aziz et al., 2018 [49]      | Average number of prescriptions per patient         | 10.88 (1.27)- first audit                                                                                                                                                                                                                                       | 10.15 (0.58)- re-audit                                                                                                                                                                                                                                         | The average number of prescriptions per patient significantly decreased, according to the results of the t-test (8% reduction), $t(1) = 28.808$ , $P = 0.022$ , 95% CI = 5.877–15.153.         |
|                             | Number of patients                                  | 51/58- first audit                                                                                                                                                                                                                                              | 39/47- re-audit                                                                                                                                                                                                                                                | No difference in the number of patients receiving polypharmacy, $t(1) = 7.500$ , $P =$                                                                                                         |

|                              |                                                                                           |                                                                                                         |                                                                                                          |                                                                                                                                                                                                              |
|------------------------------|-------------------------------------------------------------------------------------------|---------------------------------------------------------------------------------------------------------|----------------------------------------------------------------------------------------------------------|--------------------------------------------------------------------------------------------------------------------------------------------------------------------------------------------------------------|
|                              | receiving polypharmacy                                                                    |                                                                                                         |                                                                                                          | 0.084. The audit revealed that polypharmacy has decreased overall by 24%.                                                                                                                                    |
|                              | Average comorbidities per patient                                                         | 6.23 (1.52)- first audit                                                                                | 5.73 (1.02)- re-audit                                                                                    | The average number of comorbidities between the two audits significantly decreased, according to the t-test results (7% reduction), $t(1) = 23.920$ , $P = 0.027$ , 95% CI = 2.803–9.157.                    |
| Ballard et al., 2016 [31,32] | Antipsychotic use by patients                                                             | 20- Residents on anti-psychotic review<br>20- Residents not on anti-psychotic review                    | 13- Residents on anti-psychotic review<br>23- Residents not on anti-psychotic review                     | Overall, the review group's use of antipsychotics was much lower than that of the non-review group (odds ratio 0.17, 95%CI 0.05 to 0.60, $p=0.006$ )                                                         |
|                              | Quality-of-life score for people with dementia (proxy) (DEMQOL Proxy)                     | 106.51 (9.14) Residents on antipsychotic review<br>102.69 (15.22) Residents not on antipsychotic review | 102.11 (13.41) Residents on antipsychotic review<br>105.79 (10.53) Residents not on antipsychotic review | People receiving antipsychotic review showed a 4.54 (95% confidence interval (CI) 9.26 to 0.19) point worsening ( $p= 0.06$ ) in their DEMQOL-Proxy scores, which approached statistical significance.       |
| Massot et al., 2019 [37]     | Number of psychotropic drugs prescribed                                                   | 636                                                                                                     | 458                                                                                                      | Reduced by 28% (from 636 before to 458 after the intervention).                                                                                                                                              |
|                              | Mean number of psychotropic drugs prescribed per patient                                  | 2.71 (1.47)                                                                                             | 1.95 (1.24) 1-month postintervention<br>2.06 (1.36) 6-month postintervention                             | Decreased from 2.71 at baseline to 1.95 at 1-month postintervention and 2.01 at 6 months ( $p < 0.001$ for both time points). Antipsychotics were the drug class showing the highest reduction rate (49.66%) |
| Hernandez et al., 2020 [45]  | PRISMA extension for scoping reviews by Medication Appropriateness Index (MAI) mean score | 4 (4.6)                                                                                                 | 0.5 (2.6)                                                                                                | Significant differences ( $p<0.001$ ) between the mean (SD) MAI scores at admission and post-intervention (4 (4.6) vs 0.5 (2.6))                                                                             |
|                              | mean (SD) anticholinergic burden per patient                                              | 1.38 (0.7)                                                                                              | 1.08 (0.7)                                                                                               | Statistically significant differences were found between pre- and post-intervention ( $p1$ was 30 (DBI range 0.3–2.6).                                                                                       |
|                              | the number of patients who                                                                | 44 (DBI range 0.3–3)                                                                                    | 30 (DBI range 0.3–2.6)                                                                                   |                                                                                                                                                                                                              |

|                                    |                                                                                 |                                                                              |                                                                           |                                                                                                                                                                                                                                                                                                                                            |
|------------------------------------|---------------------------------------------------------------------------------|------------------------------------------------------------------------------|---------------------------------------------------------------------------|--------------------------------------------------------------------------------------------------------------------------------------------------------------------------------------------------------------------------------------------------------------------------------------------------------------------------------------------|
|                                    | presented with an anticholinergic burden >1 (considered high-risk burden limit) |                                                                              |                                                                           |                                                                                                                                                                                                                                                                                                                                            |
| Molist et al., 2014 [14]           | average of medications per person                                               | 7.27 prior to hospitalization                                                | 4.8 at discharge                                                          | 66.85% reduction, (P < 0.05)                                                                                                                                                                                                                                                                                                               |
| Gustafsson et al., 2017 [17,26-28] |                                                                                 |                                                                              |                                                                           | multiple Cox regression model revealed that after adjustment for heart failure, the intervention significantly reduced the risk of drug-related readmissions (HR 0.49, 95% CI 0.27–0.90, p = 0.02).                                                                                                                                        |
|                                    | People with DRPs (n= 140)<br>People without DRPs (n= 72)                        |                                                                              |                                                                           | DRPs were more common among people taking a higher number of drugs (OR, 1.255 [95% CI, 1.137- 1.385])                                                                                                                                                                                                                                      |
|                                    |                                                                                 |                                                                              |                                                                           | DRPs were more common among people with an earlier stroke (OR, 5.042 [95% CI, 2.032-12.509])<br>people with heart failure (OR, 2.66 [95% CI, 1.64–4.30]),<br>diabetes mellitus (OR, 2.32 [95% CI, 1.41–3.81]),                                                                                                                             |
|                                    | Number of patients using anticholinergic drugs; NSAIDs; exposed to PIMs         | 15 (7.1%) at admission;<br>7 (3.3%) at admission;<br>43 (20.3%) at admission | 7 (3.3%) at discharge<br>2 (0.9%) at discharge<br>30 (14.2%) at discharge | Anticholinergic drugs use decreased significantly from 7.1% to 3.3 % (p = 0.005)<br>the use of NSAIDs decreased from 3.3% to 0.9% (p = 0.025)<br>PIMs decreased significantly from 20.3% to 14.2% (p = 0.002)                                                                                                                              |
| Wucherer et al., 2017 [43]         |                                                                                 |                                                                              |                                                                           | In the multivariate Poisson regression analysis, the total number of drugs taken (b = 0.07; 95% CI: 0.05–0.09; p < 0.001) and the presence of a diagnosis of mental and behavioral disorders (b = 0.09; 95% CI: 0.03–0.15; p = 0.003) were associated with total number of DRPs (significant regression model: F(11,89) = 6.18, p < 0.001) |

Note: - PIM, Potentially inappropriate medication; LWD, Living with dementia; DBI, Drug burden index; HR, Hazard ratio; OR, Odds ratio; DRPs, Drug-related problems; NSAIDs, Non-steroidal anti-inflammatory drugs
